# Supplementary material for: Immunomagnetic Isolation of HER2-Positive Breast Cancer Cells Using a Microfluidic Device
Source: PubMed Central journal article supplement — ACS Omega. 2023 Jun 6;8(24):21745–54. doi: 10.1021/acsomega.3c01287 (PMC10286087; doi:10.1021/acsomega.3c01287), 2023-06-06
Supplement: ao3c01287_si_001.pdf [file ao3c01287_si_001.pdf]

## Supporting Information

# Immunomagnetic Isolation of HER2-Positive Breast Cancer Cells Using a Microfluidic Device

Delaram Parvin<sup>1</sup>, Zahra Sadat Hashemi<sup>2</sup>, Farhad Shokati<sup>3</sup>, Zahra Mohammadpour<sup>\*,3</sup>, Vahid Bazargan<sup>\*,1</sup>

<sup>1</sup> School of Mechanical Engineering, College of Engineering, University of Tehran, North Amirabad, 1439957131, Tehran, Iran

<sup>2</sup> ATMP Department, Breast Cancer Research Center, Motamed Cancer Institute, ACECR, No. 146, South Gandhi Street, Vanak Square 1517964311, Tehran, Iran

<sup>3</sup> Biomaterials and Tissue Engineering Department, Breast Cancer Research Center, Motamed Cancer Institute, No. 146, South Gandhi Street, Vanak Square, Tehran 1517964311, Iran

\*Corresponding authors emails:

[vbazargan@ut.ac.ir](mailto:vbazargan@ut.ac.ir)

[mohammadpour@acecr.ac.ir](mailto:mohammadpour@acecr.ac.ir)

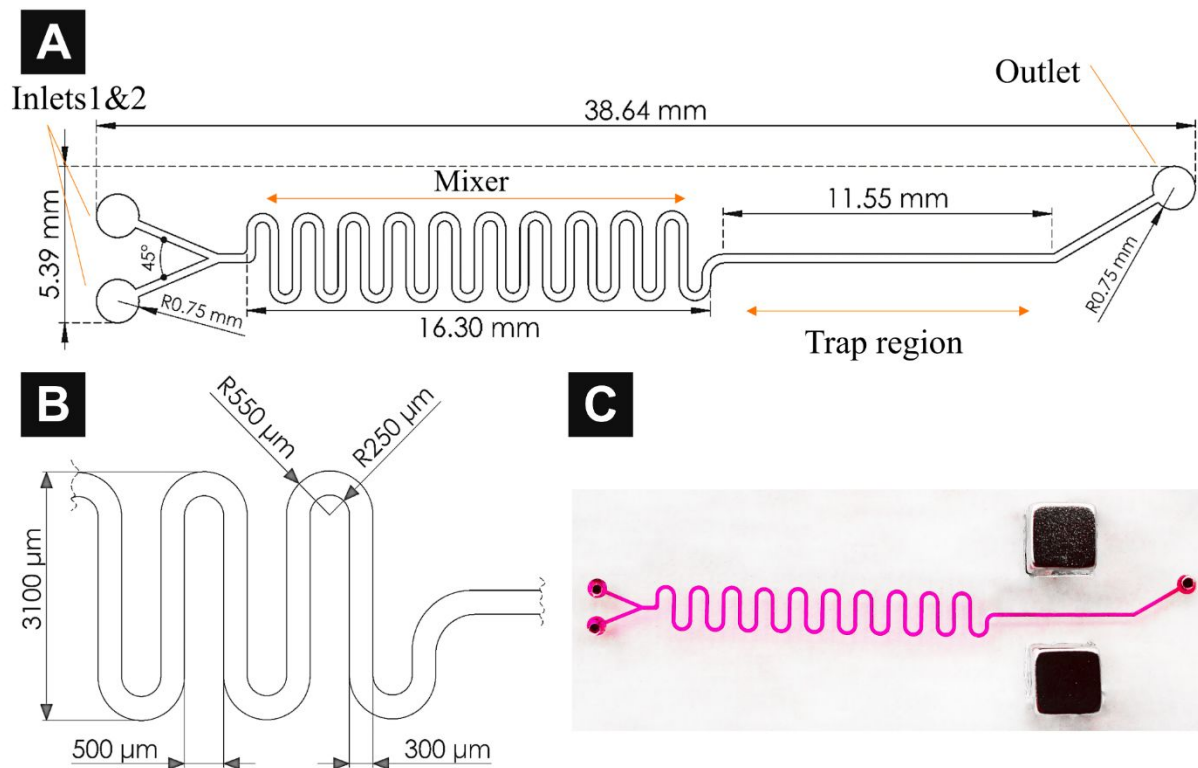

**Figure S1.** (A, B) A representation of the chip's configuration along with the respected dimensions, (C) an image of the fabricated microfluidic channel with the magnets.

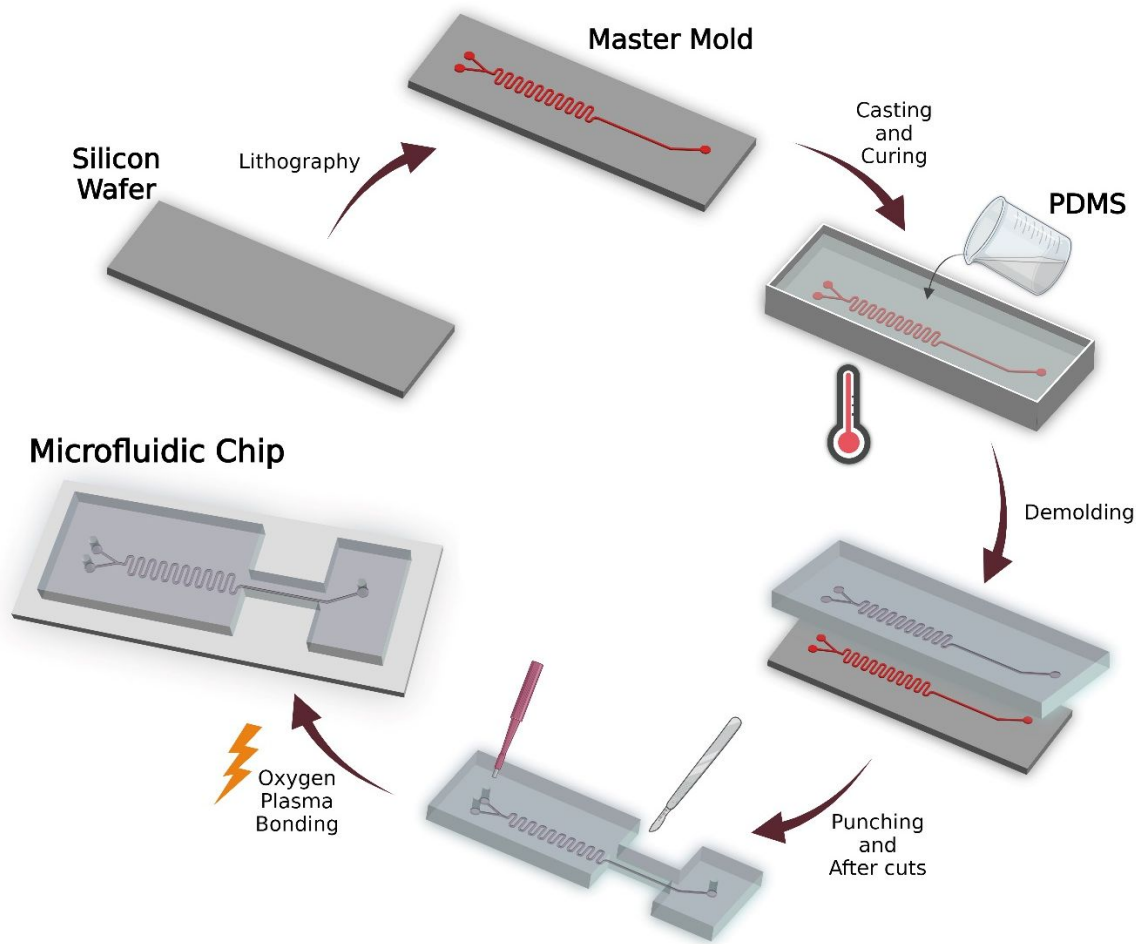

**Figure S2.** The fabrication process of the microfluidic chip used in the present study

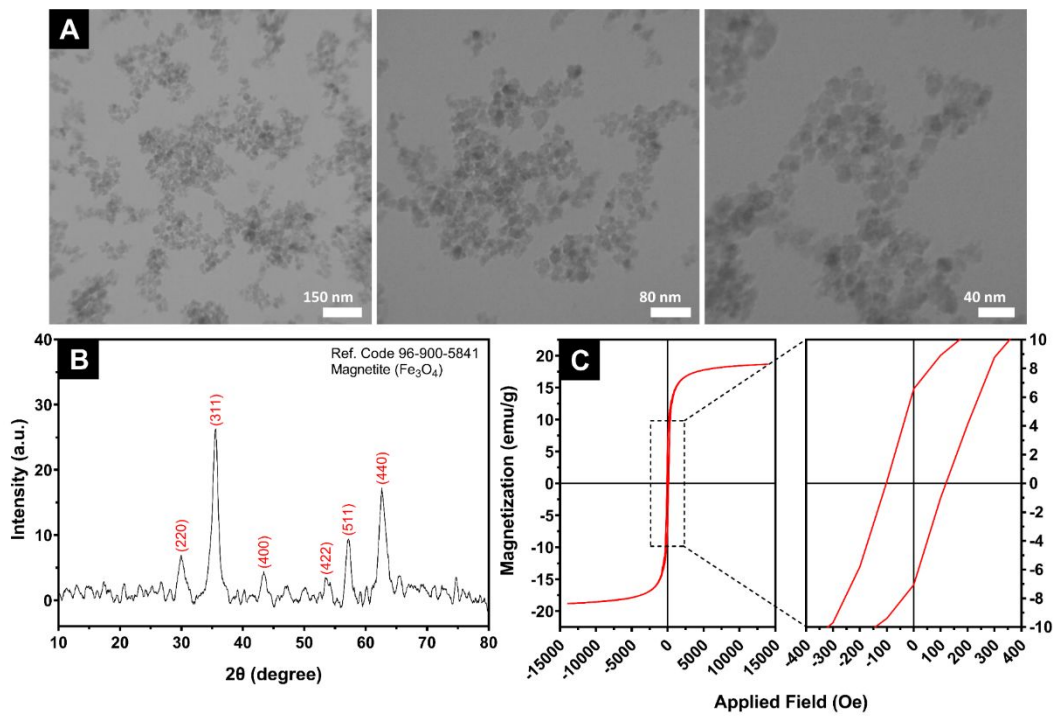

**Figure S3.** Characterization of bare MNPs by (A) TEM analysis with different magnifications, (B) XRD, and (C) VSM analysis

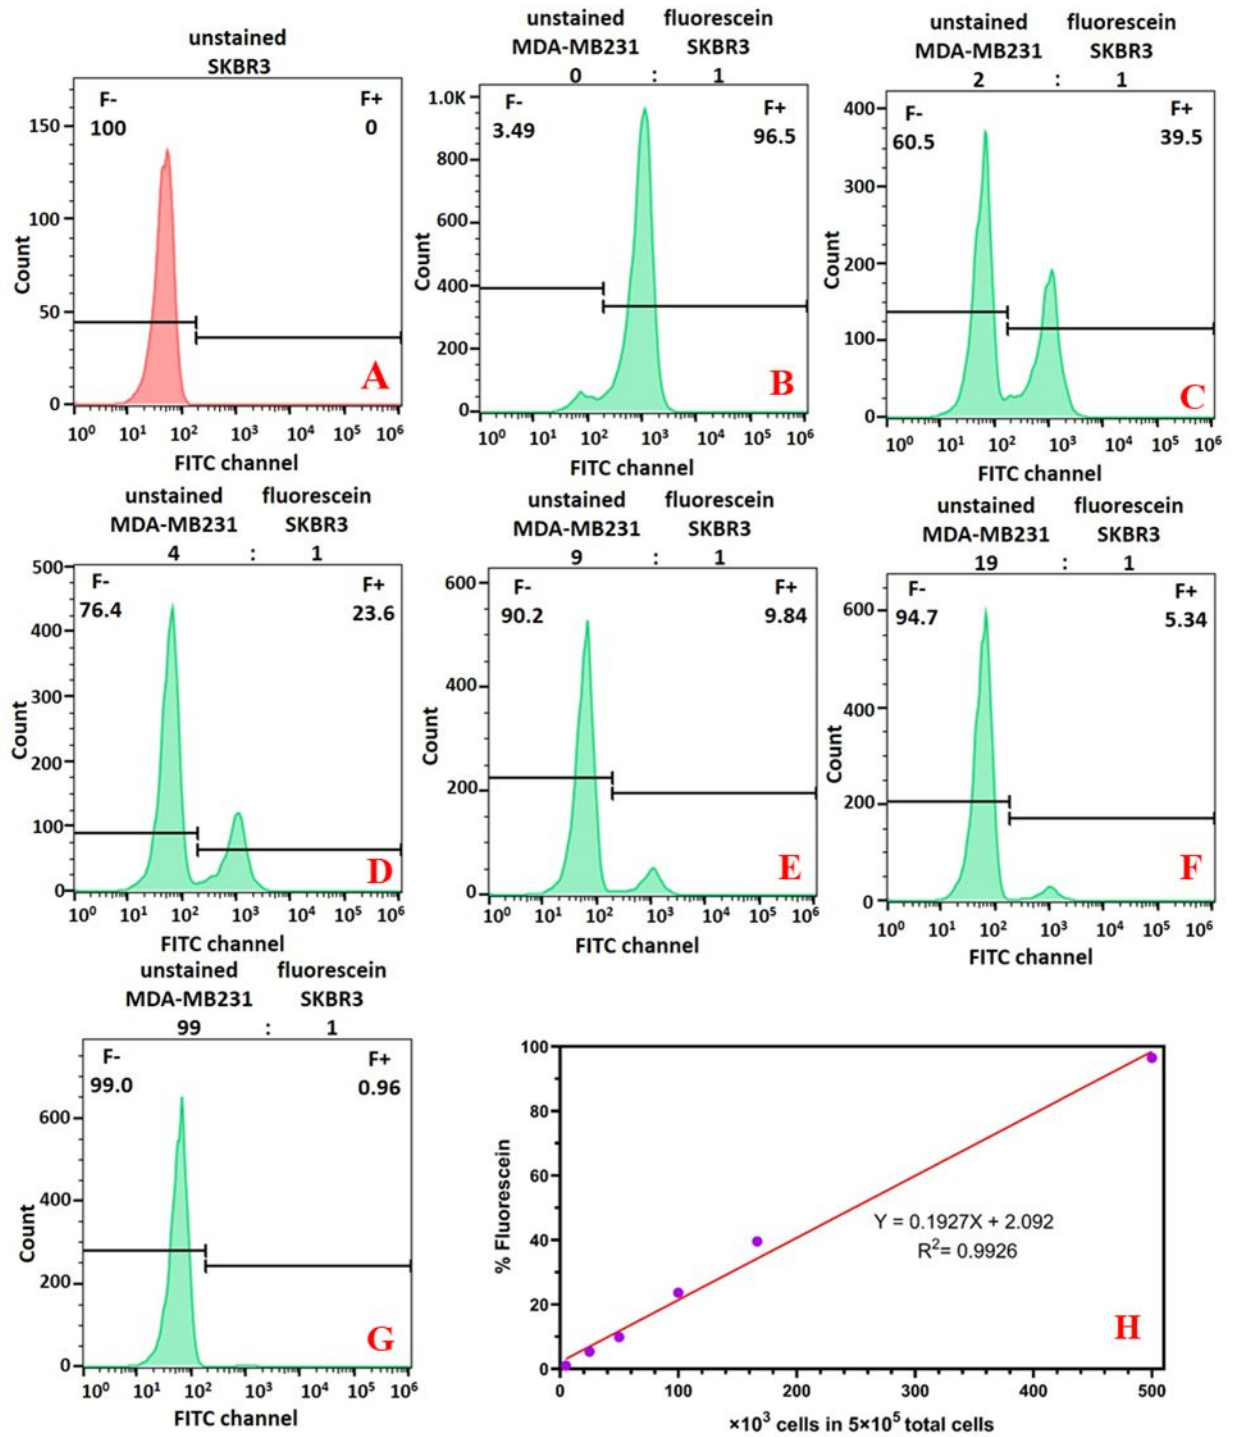

**Figure S4.** (A)  $5 \times 10^5$  unstained SK-BR-3 cells; fluorescein-stained SK-BR-3 mixed with unstained MDA-MB-231 in different ratios of (B) 1:0, (C) 1:2, (D) 1:4, (E) 1:9, (F) 1:19, (G) 1:99; (H) the standard curve
